# Supplementary material for: Identification of Sex-Associated Genetic Markers in Pistacia lentiscus var. chia for Early Male Detection
Source: MDPI journal article supplement (doi:10.3390/genes15050632), 2024-05-16
Supplement: s1 [file s1]

# Identification of Sex-Associated Genetic Markers in *Pistacia lentiscus* var. *chia* for Early Male Detection

Evangelia Stavridou <sup>1,2</sup>, Ioanna Karamichali <sup>2</sup>, Evangelos Siskas <sup>1</sup>, Irini Bosmali <sup>2</sup>, Maslin Osanthanunkul <sup>3,4</sup> and Panagiotis Madesis <sup>2,5,\*</sup>

<sup>1</sup> Department of Botany, School of Biology, Aristotle University of Thessaloniki, 54124 Thessaloniki, Greece

<sup>2</sup> Laboratory of Agrobiotechnology and Molecular Plant Breeding, Institute of Applied Biosciences (INAB), Center for Research and Technology (CERTH), 57001 Thessaloniki, Greece

<sup>3</sup> Department of Biology, Faculty of Science, Chiang Mai University, Chiang Mai 50200, Thailand

<sup>4</sup> Research Centre in Bioresources for Agriculture, Industry and Medicine, Chiang Mai University, Chiang Mai 50200, Thailand

<sup>5</sup> Laboratory of Molecular Biology of Plants, Department of Agriculture Crop Production and Rural Environment, School of Agricultural Sciences, University of Thessaly, 38446 Volos, Greece

\* Correspondence: pmadesis@uth.gr

**Table S2:** Average PIC and standard error (SE) values for the ISSR, RAPD and SCAR markers used for distinguishing male and female mastic trees.

| Marker   | Average PIC value Males | Average PIC value females | Average GD value overall |
|----------|-------------------------|---------------------------|--------------------------|
| AC8CG    | 0.2661±0.0432           | 0.2701±0.0237             | 0.3407±0.0428            |
| AC8TA    | 0.3656±0.0439           | 0.2262±0.0465             | 0.4192±0.0358            |
| UBC860   | 0.3637±0.0221           | 0.1809±0.0399             | 0.3248±0.0246            |
| UBC811   | 0.3659±0.0346           | 0.2996±0.0405             | 0.3643±0.0337            |
| UBC891   | 0.3036±0.0341           | 0.1881±0.041              | 0.2872±0.0353            |
| UBC823   | 0.3015±0.0302           | 0.2918±0.0494             | 0.3317±0.0351            |
| UBC880   | 0.3851±0.0279           | 0.2511±0.0387             | 0.3692±0.0292            |
| UBC807   | 0.2995±0.0399           | 0.2036±0.0405             | 0.3032±0.0391            |
| UBC841   | 0.4244±0.0204           | 0.265±0.0389              | 0.4291±0.0155            |
| UBC834   | 0.3128±0.0401           | 0.2921±0.034              | 0.3529±0.0277            |
| UBC827   | 0.3181±0.0296           | 0.307±0.0338              | 0.3512±0.0225            |
| UBC856   | 0.3304±0.0319           | 0.3948±0.0242             | 0.3715±0.0262            |
| UBC850   | 0.2601±0.0461           | 0.1142±0.0237             | 0.2461±0.0478            |
| UBC842   | 0.3397±0.0233           | 0.2716±0.0291             | 0.3652±0.0248            |
| OPO08    | 0.2362±0.0342           | 0.3113±0.0459             | 0.2912±0.0361            |
| SCO08    | 0.346±0.0672            | 0.2656±0.0608             | 0.4±0.0513               |
| PVF1PVF2 | 0.1991±0.0471           | 0.3973±0.0359             | 0.3133±0.0438            |

**Table S3:** AMOVA analysis of 20 female individuals and the 49 males assigned to the different *P. lentiscus* var. *chia* cultivars.

| Source      | df | SS       | MS     | Est. Var. | %    | $\Phi_{ST}$          |
|-------------|----|----------|--------|-----------|------|----------------------|
| Among Pops  | 5  | 414.202  | 82.840 | 5.593     | 21%  | 0.214<br>$p < 0.001$ |
| Within Pops | 63 | 1290.957 | 20.491 | 20.491    | 79%  |                      |
| Total       | 68 | 1705.159 |        | 26.084    | 100% |                      |

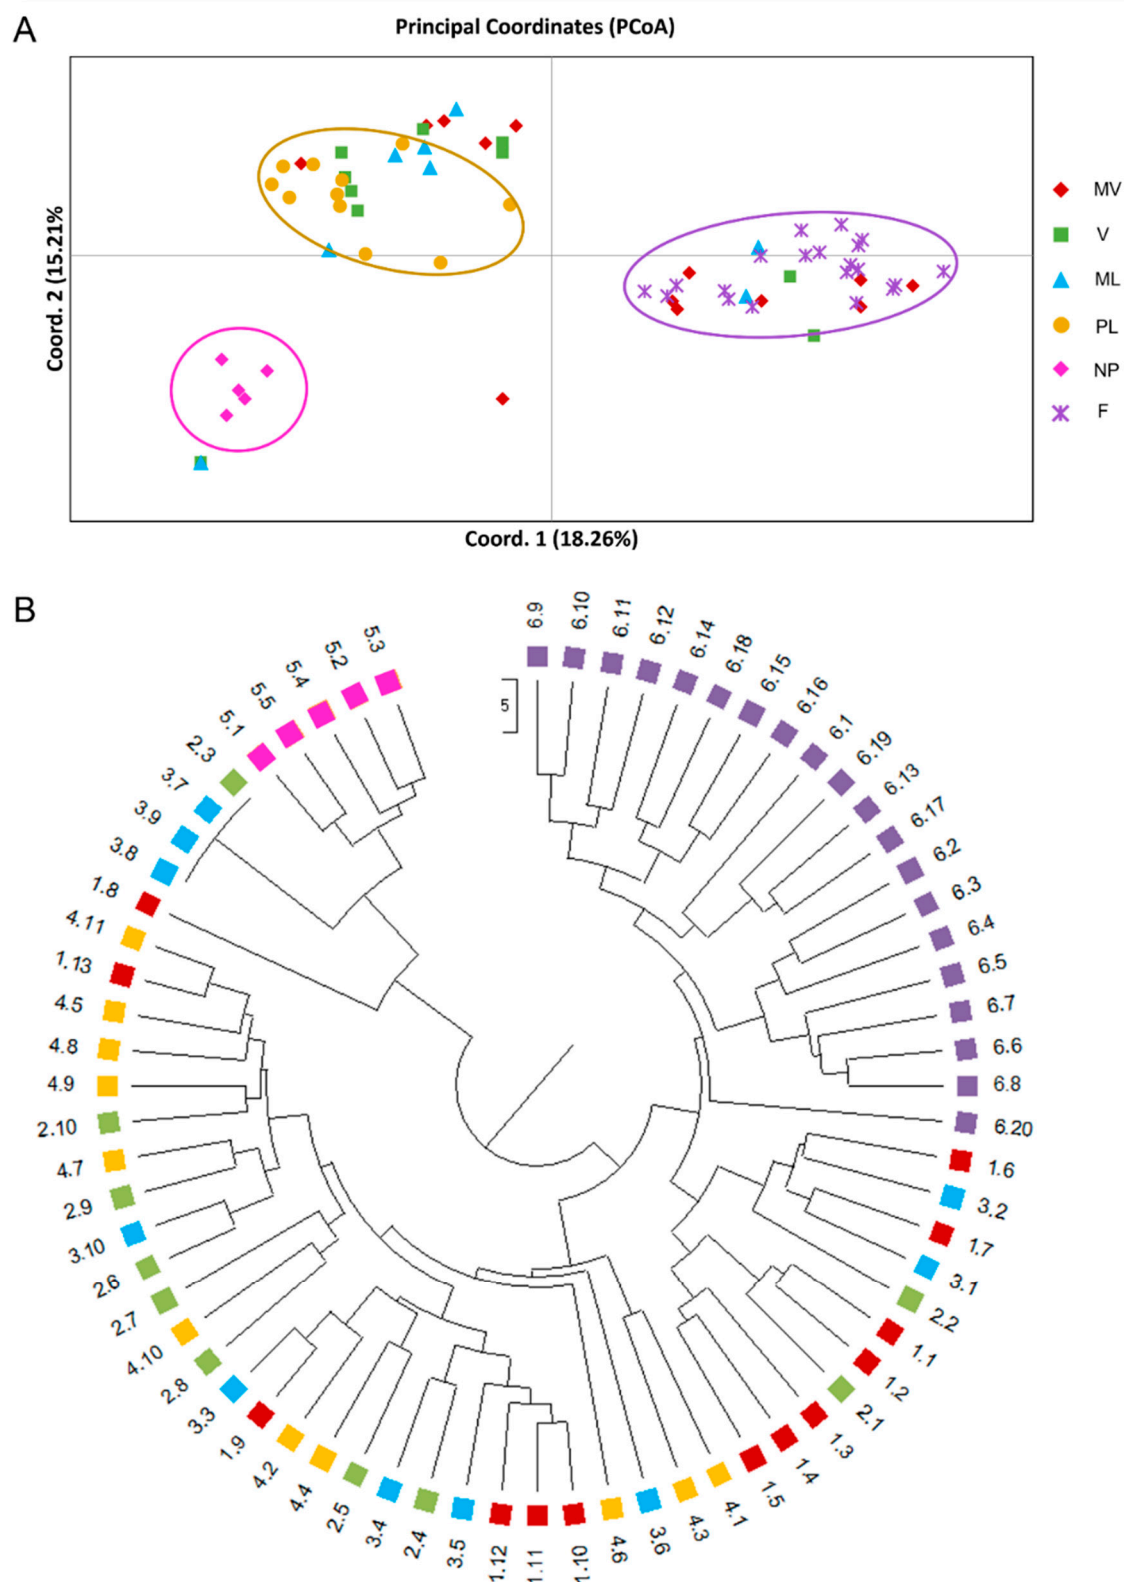

**Figure S1.** Genetic relationships of 20 female and 49 male individuals of five *P. lentiscus* var. *chia* cultivars based on the ISSR polymorphism analysis. A. Principal Coordinate Analysis (PCoA) based on 134 polymorphic ISSR loci. The first two coordinates accounted for 33.47% of the total variance (axis 1 = 18.26%; axis 2 = 15.21%). B. The unweighted pairgroup method using arithmetic average (UPGMA) dendrogram of the six populations.

**Table S4.** Transcriptome-based primers designed based on the markers selected.

| # | Name     | Sequence                        | Product size | Ta | Transcript annotation                                                                 | Type                       |
|---|----------|---------------------------------|--------------|----|---------------------------------------------------------------------------------------|----------------------------|
| 1 | MYB1_F   | AGTAGTGGTAGGAGTTCGGTGAT         | 100          | 50 | MYB DNA-binding<br>masttrinLocDN1068c0g1t5.p1<br>length: 796bp                        | SNP/EST-SSR                |
|   | MYB1_R   | CCGGATCCAACGCCGT                |              |    |                                                                                       |                            |
|   | MYB3_F   | ATTGCGGAGCATGTTGGTA             | 100          | 50 |                                                                                       |                            |
|   | MYB3_R   | TGGGAACCTCAATACTTTCTAGTAGG      |              |    |                                                                                       |                            |
| 2 | SUF4_F   | ATGCGAAAGCTGGAAGAGAGT           | 100          | 52 | SUF4<br>masttrinLocDN36c0g1t2.p1<br>length: 412bp                                     |                            |
|   | SUF4_R   | TCTTCTTCTTCTTCTCCATAGTGAGC      |              |    |                                                                                       |                            |
| 3 | SPL91_F  | ATGCTAAGGCTTACTATTCTAGGC        | 100          | 52 | SPL9<br>masttrinNODE_19933_length_2204co<br>v_75.335523_g9274_i1.p1<br>length: 397bp  |                            |
|   | SPL91_R  | CACTGTTGGCAAAACCTCTGC           |              |    |                                                                                       |                            |
|   | SPL92_F  | ACAGCTGTTAATCAATATCCAAACG       | 100          | 52 |                                                                                       |                            |
|   | SPL92_R  | TTGGTCCCAAACCAAGGTG             |              |    |                                                                                       |                            |
| 4 | ELF61_F  | ACTTCTTCAACTATCTCATTGG          | 100          | 52 | ELF6<br>masttrinR17271602.p1<br>GENE.masttrinR17271602<br>length: 1627bp              |                            |
|   | ELF61_R  | CAAGCTTCCAACCCG                 |              |    |                                                                                       |                            |
|   | ELF62_F  | ATAATCATCAGACACGACAAATCATCA     | 100          | 53 |                                                                                       |                            |
|   | ELF62_R  | GCTGCATTGATATGTCCACCAG          |              |    |                                                                                       |                            |
|   | ELF63_F  | ATGTCTCTGTGAATGAGGTCTC          | 100          | 52 |                                                                                       |                            |
|   | ELF63_R  | ACCTTGCTCTCCATCTCTGT            |              |    |                                                                                       |                            |
|   | ELF65_F  | AGGGCTCAGACCGCAA                | 100          | 52 |                                                                                       |                            |
|   | ELF65_R  | GGGTTCTGCAGTACTTCTGAAT          |              |    |                                                                                       |                            |
|   | ELF66_F  | CTTCTTCATCTAAAGACGAAAGAGAGAT    | 100          | 53 |                                                                                       |                            |
|   | ELF66_R  | TCCACTTCACTCTTTCTTTTCTTCC       |              |    |                                                                                       |                            |
| 5 | Rpr21_F  | ACTGTTGCCACAGCTAATATCG          | 100-106      | 55 | Rpr2<br>masttrinNODE_53355_length_1162co<br>v_20.313131_g28763_i0.p1<br>length: 309bp | EST-SSR                    |
|   | Rpr21_R  | TAGTTTCTCCACTCTCATACTGCC        |              |    |                                                                                       |                            |
| 6 | ACS1_F   | ATTGAGGACCCTGCTGGT              | 100          | 55 | ACS<br>masttrinLocDN2609c0g1t2.p1<br>length: 774bp                                    | Differential<br>Expression |
|   | ACS1_R   | TCCTGATGTCAAGATTCTCTGAG         |              |    |                                                                                       |                            |
|   | ACS2_F   | GGTATTATAATAATTTCTGTTTACCCGGTCT | 156-141      | 55 |                                                                                       |                            |
|   | ACS2-3_R | ACCCGAAAAAGACAAGGAGGAT          |              |    |                                                                                       |                            |
|   | ACS3_F   | ATAAAGCTCCAGTTTTGGTCTCAACA      | 105-90       | 55 |                                                                                       |                            |
|   | ACS2-3_R | ACCCGAAAAAGACAAGGAGGAT          |              |    |                                                                                       |                            |

|                                          |      |                                                                        |      |
|------------------------------------------|------|------------------------------------------------------------------------|------|
| <b>Myb_3</b>                             |      |                                                                        |      |
| Q                                        | 1261 | CTTGAGGGTATAGAAATCTACAATGATAATTGGAATGA                                 | 1320 |
| M                                        | 1413 | .....                                                                  | 1472 |
| F                                        | 1440 | .....                                                                  | 1381 |
| B                                        | 1538 | .....                                                                  | 1479 |
| ..... <b>AATTCGGAGCATGTTGGTAAC</b> ..... |      |                                                                        |      |
| Q                                        | 1321 | AAGTCAAAAGCACAAATGTATCTCCATTTTGTCCGTCTACCCATGGAGGATGG <b>CCTACTA</b>   | 1380 |
| M                                        | 1473 | ..... <b>C</b> ..... <b>T</b> .....                                    | 1532 |
| F                                        | 1380 | ..... <b>N</b> .....                                                   | 1321 |
| B                                        | 1478 | ..... <b>C</b> ..... <b>T</b> .....                                    | 1419 |
| Q                                        | 1381 | <b>GAAAGTATTGAGGTTCCCA</b> ACTGTCCAGCCATCCGATTCATCAAGTAGAGATGATACT     | 1440 |
| M                                        | 1533 | .....                                                                  | 1592 |
| F                                        | 1320 | .....                                                                  | 1261 |
| B                                        | 1418 | .....                                                                  | 1359 |
| .....                                    |      |                                                                        |      |
| <b>SPL9_2</b>                            |      |                                                                        |      |
| Q                                        | 961  | <b>ACAGCTGTTAATCAATATCCAAACG</b> TGTCATGGGTTTCAAGGGCAATGAAGCCACTAGC    | 1020 |
| M                                        | 1529 | ..... <b>N</b> .....                                                   | 1588 |
| F                                        | 602  | .....                                                                  | 543  |
| B                                        | 914  | ..... <b>G</b> .....                                                   | 973  |
| Q                                        | 1021 | <b>AGTTCACAGCAAATGCCCCCTCACCTGGTTTGGACCAAT</b> GTCCACAGCCTGTAAACAGT    | 1080 |
| M                                        | 1589 | .....                                                                  | 1648 |
| F                                        | 542  | .....                                                                  | 483  |
| B                                        | 974  | .....                                                                  | 1033 |
| .....                                    |      |                                                                        |      |
| <b>ELF6_1</b>                            |      |                                                                        |      |
| Q                                        | 781  | ACATCCAACCTGTGTACAA <b>ACTTCTTCAACTATCTCAT</b> TGGATGAAAATTACAAATCTCT  | 840  |
| M                                        | 4313 | ..... <b>N</b> .....                                                   | 4254 |
| F                                        | 4252 | ..... <b>N</b> .....                                                   | 4193 |
| B                                        | 4375 | .....                                                                  | 4316 |
| Q                                        | 841  | <b>AGACGAAAGATTGTAATGGTAGTAATGATTGGAAGGTACAGCGGTTGGAAGCTTGCA</b>       | 900  |
| M                                        | 4253 | ..... <b>N</b> .....                                                   | 4194 |
| F                                        | 4192 | ..... <b>N</b> .....                                                   | 4133 |
| B                                        | 4315 | ..... <b>N</b> .....                                                   | 4256 |
| .....                                    |      |                                                                        |      |
| <b>ELF6_3</b>                            |      |                                                                        |      |
| Q                                        | 3241 | AATCTATTGGTGATAGG <b>ATGTCTCTGTGAATGAGGTCTCT</b> TATCTCTGCTAATTCACCA   | 3300 |
| M                                        | 1853 | .....                                                                  | 1794 |
| F                                        | 1792 | ..... <b>N</b> .....                                                   | 1733 |
| B                                        | 1915 | ..... <b>C</b> .....                                                   | 1856 |
| Q                                        | 3301 | <b>AGTTTACATGTTGCTCATCCACCTCTGGGGAATTTTGACACAGAGATGGAGGACAAAGTT</b>    | 3360 |
| M                                        | 1793 | ..... <b>A</b> ..... <b>N</b> .....                                    | 1734 |
| F                                        | 1732 | ..... <b>N</b> .....                                                   | 1673 |
| B                                        | 1855 | .....                                                                  | 1796 |
| .....                                    |      |                                                                        |      |
| <b>ELF6_6</b>                            |      |                                                                        |      |
| Q                                        | 4201 | TCAGAAAAATTCACATTAGCAAAAGAGTT <b>CTTCTTCTATCTAAAGACGAAAGAGAGATA</b>    | 4260 |
| M                                        | 893  | .....                                                                  | 834  |
| F                                        | 832  | ..... <b>N</b> .....                                                   | 773  |
| B                                        | 955  | .....                                                                  | 896  |
| Q                                        | 4261 | <b>GAAAACAAGTCCACTGCAGAAGAGCCAGTTCAAGTGCCGGTAAAGGAAGAAAAAGGAG</b>      | 4320 |
| M                                        | 833  | ..... <b>N</b> ..... <b>G</b> ..... <b>N</b> .....                     | 774  |
| F                                        | 772  | .....                                                                  | 713  |
| B                                        | 895  | .....                                                                  | 836  |
| .....                                    |      |                                                                        |      |
| <b>Rpr21</b>                             |      |                                                                        |      |
| Q                                        | 721  | ACCGGTGTGGGAGAGGCTGGTAGTGGTCT <b>ACTGTTGCCACAGCTAATATCGGTGGT</b>       | 780  |
| M                                        | 536  | .....                                                                  | 595  |
| F                                        | 443  | ..... <b>N</b> .....                                                   | 384  |
| Q                                        | 781  | <b>AGTGGTGTACTGTTACTGGTGGTGCACACTGGAGTTGGAACACTTGGCAGTATGAGAGT</b>     | 840  |
| M                                        | 596  | .....                                                                  | 655  |
| F                                        | 383  | .....                                                                  | 318  |
| .....                                    |      |                                                                        |      |
| <b>ACS_1</b>                             |      |                                                                        |      |
| Q                                        | 841  | TTGGAAATGTACAAAAGGTCC <b>ATTGAGGACCCCTGCTGGT</b> TTCTGGGCCGATATTGCTTCC | 480  |
| M                                        | 656  | .....                                                                  | 2376 |
| F                                        | 317  | .....                                                                  | 601  |
| B                                        | 317  | .....                                                                  | 1304 |
| .....                                    |      |                                                                        |      |
| <b>ACS_2</b>                             |      |                                                                        |      |
| Q                                        | 841  | ATGGGCAGTAATCCCCGTGTAGTTGGGT <b>GGTATTATAATAATTCTGTTTACCCGGTCTA</b>    | 60   |
| M                                        | 656  | .....                                                                  | 60   |
| F                                        | 317  | .....                                                                  | 60   |
| B                                        | 317  | .....                                                                  | 60   |
| Q                                        | 841  | <b>GGACTAGGAGGAGTACTTATAAAGTCCAGTTTGGTCTCAACACATCAAGTCAACAA</b>        | 120  |
| M                                        | 656  | .....                                                                  | 120  |
| F                                        | 317  | .....                                                                  | 120  |
| B                                        | 317  | .....                                                                  | 120  |
| Q                                        | 841  | <b>CAAAACATTCATCATCTTCCTTGGCAACACCTTCTCTTCACTCCTCTGTCTTTTCG</b>        | 180  |
| M                                        | 656  | .....                                                                  | 180  |
| F                                        | 317  | .....                                                                  | 180  |
| B                                        | 317  | .....                                                                  | 180  |
| Q                                        | 841  | <b>GGTGTGTTGGCGGTGCTGGTTTCAGAAAGGCGGTAGTGGTATGGCAATCATCTGGTTT</b>      | 240  |
| M                                        | 656  | .....                                                                  | 225  |
| F                                        | 317  | .....                                                                  | 240  |
| B                                        | 317  | .....                                                                  | 240  |

**Figure S2.** Primer design for the eight most informative markers based on the polymorphism information content (PIC) values (Table SX and Table 5) comprised of six EST-SSRs and two DEG-based markers (MYB3, SPL92, ELF61, ELF63, ELF66, Rpr21, ACS1 and ACS2) found in mastic trees. Letters stand for Q = Query, M = Male, F = Female, B = Monoecious. The product is presented with bold letters, while the primers used are shown in red. Polymorphisms are highlighted in yellow, while deletions found in some of the repeats are highlighted in grey.

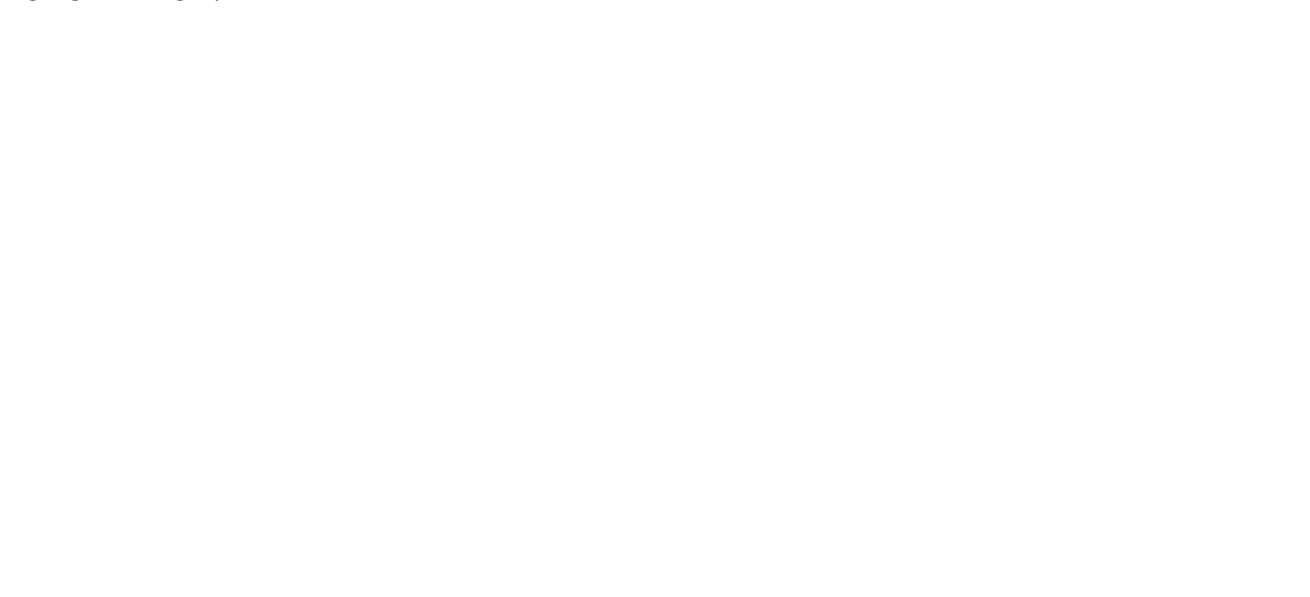

**Table S5:** Average PIC and standard error (SE) values for the transcriptome-based markers used for distinguishing male and female mastic trees.

| Marker | Average PIC<br>value MALE | Average PIC<br>value FEMALE | Average PIC<br>value ALL |
|--------|---------------------------|-----------------------------|--------------------------|
| MYB1   | 0.472±0                   | 0.437±0.0124                | 0.4612±0.0036            |
| MYB3   | 0.454±0.0275              | 0.397±0.0159                | 0.4417±0.0175            |
| SPL91  | 0.413±0.0606              | 0.4375±0.0124               | 0.4335±0.0349            |
| SPL92  | 0.371±0.0312              | 0.475±0.0141                | 0.4667±0.0158            |
| HYP A1 | 0.311±0.0734              | 0.235±0.099                 | 0.2846±0.0824            |
| ELF61  | 0.392±0.0459              | 0.375±0.0849                | 0.4571±0.0284            |
| ELF62  | 0.447±0.0067              | 0.37±0.0354                 | 0.4503±0.0347            |
| ELF63  | 0.309±0.1046              | 0.235±0.099                 | 0.3186±0.1283            |
| ELF65  | 0.358±0.022               | 0.235±0.099                 | 0.3182±0.0466            |
| ELF66  | 0.284±0.1223              | 0.4375±0.0124               | 0.3885±0.0783            |
| RpR21  | 0.344±0.0661              | 0.24±0.1697                 | 0.345±0.0145             |
| ACS1   | 0.278±0.156               | 0.3475±0.0194               | 0.3285±0.1135            |
| ACS2   | 0.323±0.1144              | 0.3775±0.0866               | 0.3985±0.0233            |
| ACS3   | 0.323±0.1144              | 0.435±0.0424                | 0.4009±0.039             |

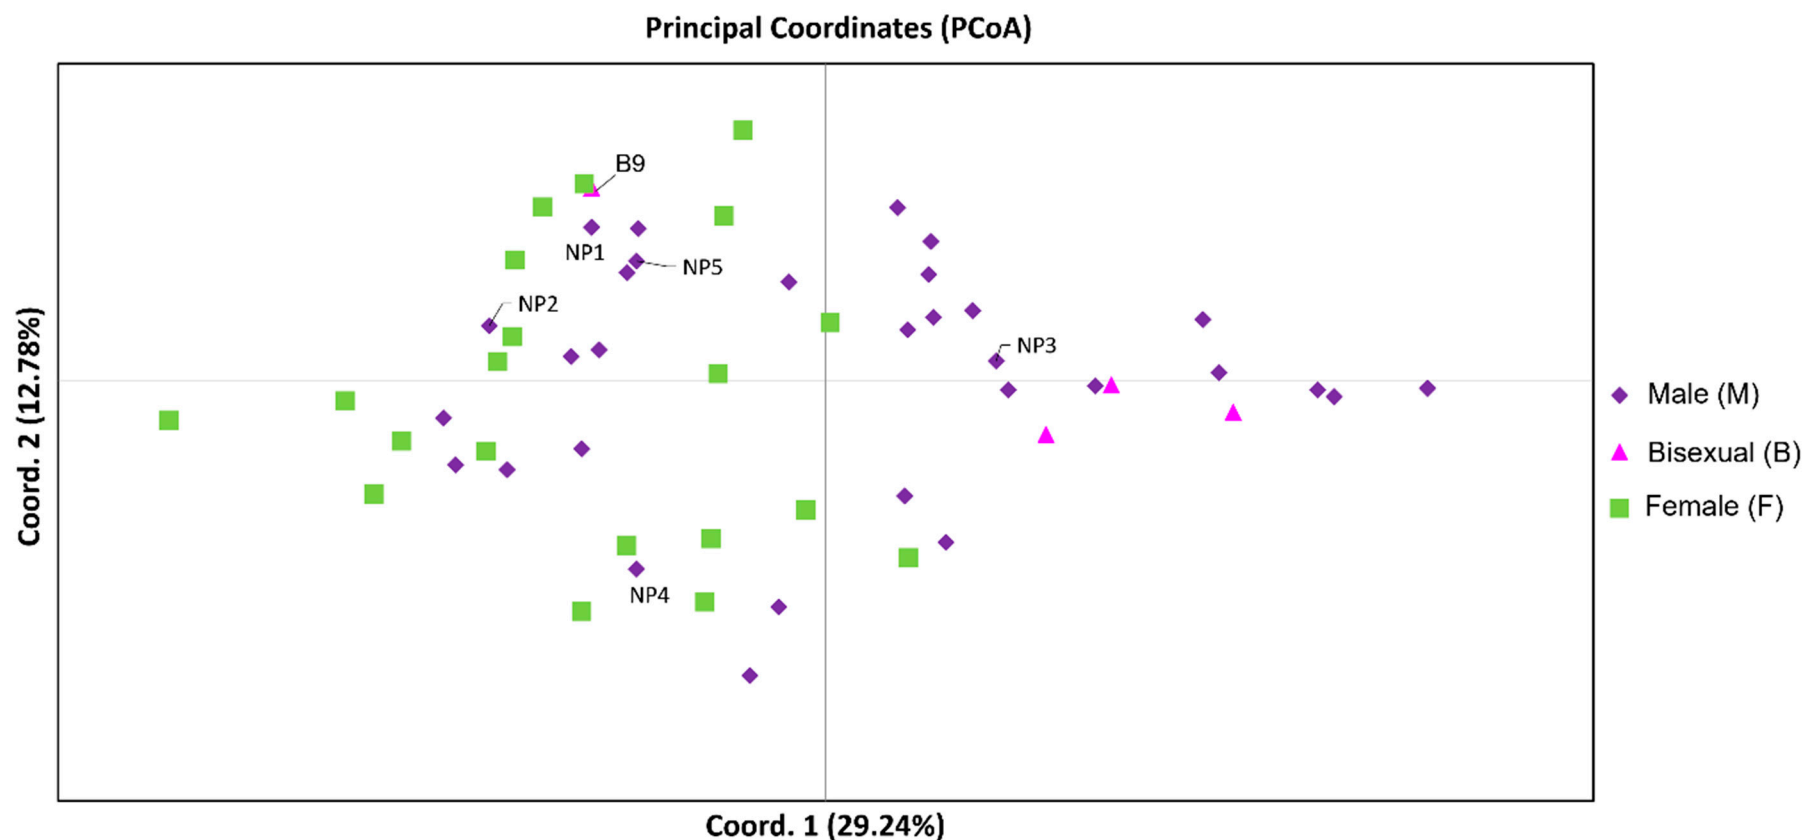

**Figure S3.** Principal Coordinate Analysis (PCoA) of the 34 male and 5 non-productive male individuals along with four bisexual and 20 female *P. lentiscus* var. Chia individuals based on the developed 14 ESTSSR and four DEG-based polymorphic loci. The first two coordinates accounted for 42.02% of the total variance (axis 1 = 29.24%; axis 2 = 12.67%). The PCoA analysis shows the partial separation of the two sex types (male vs. female) as distinct groups. Most of the male NP individuals are grouped with the F population, whereas most three out of four bisexual individuals are grouped with the male population.
